# Supplementary material for: Age-Dependent Assessment of Genes Involved in Cellular Senescence, Telomere, and Mitochondrial Pathways in Human Lung Tissue of Smokers, COPD, and IPF: Associations With SARS-CoV-2 COVID-19 ACE2-TMPRSS2-Furin-DPP4 Axis
Source: PubMed Central journal article supplement (PMC7510459; doi:10.3389/fphar.2020.584637), 2020-09-09

Supplementary Figure 1.

Full unedited gels/blots for Fig. 10 (original and unprocessed)

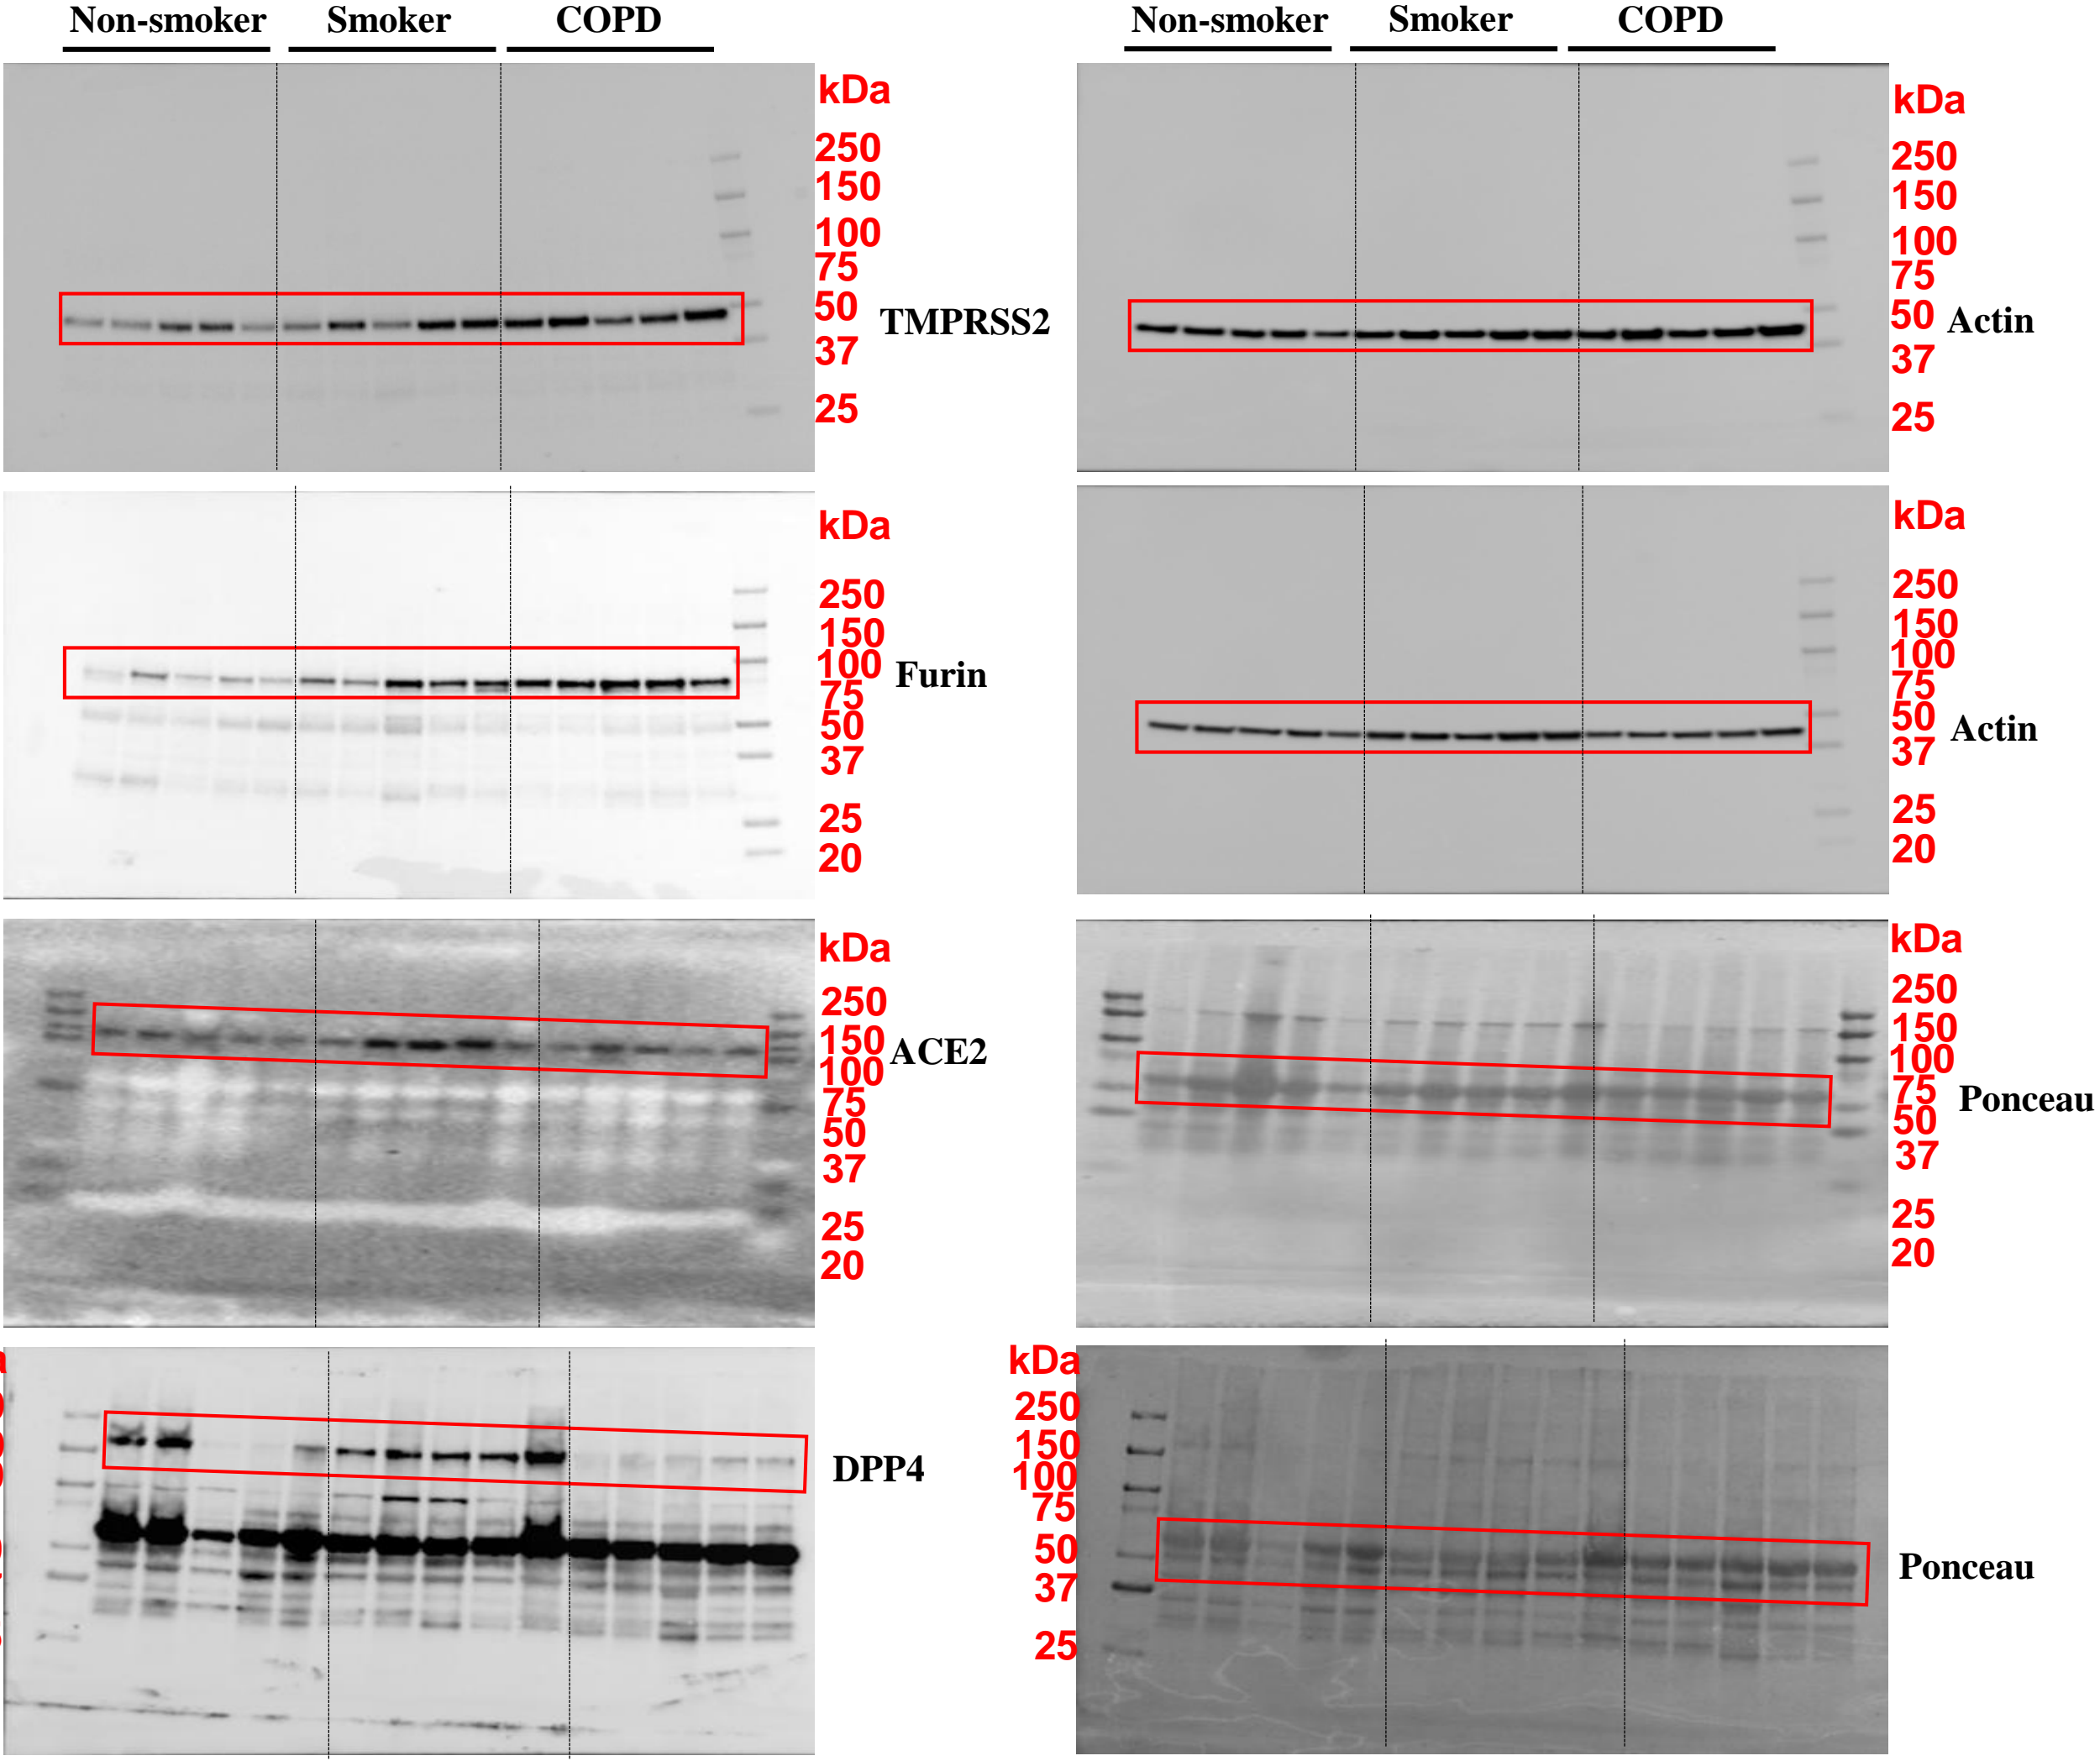

Full unedited gels/blots for Fig. 11 (original and unprocessed)

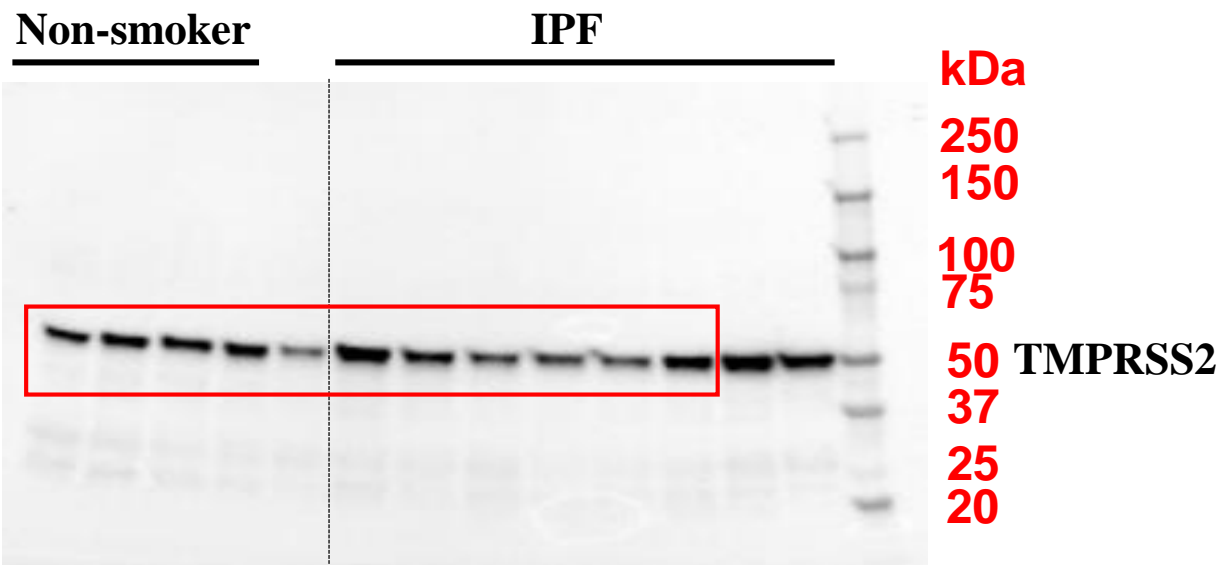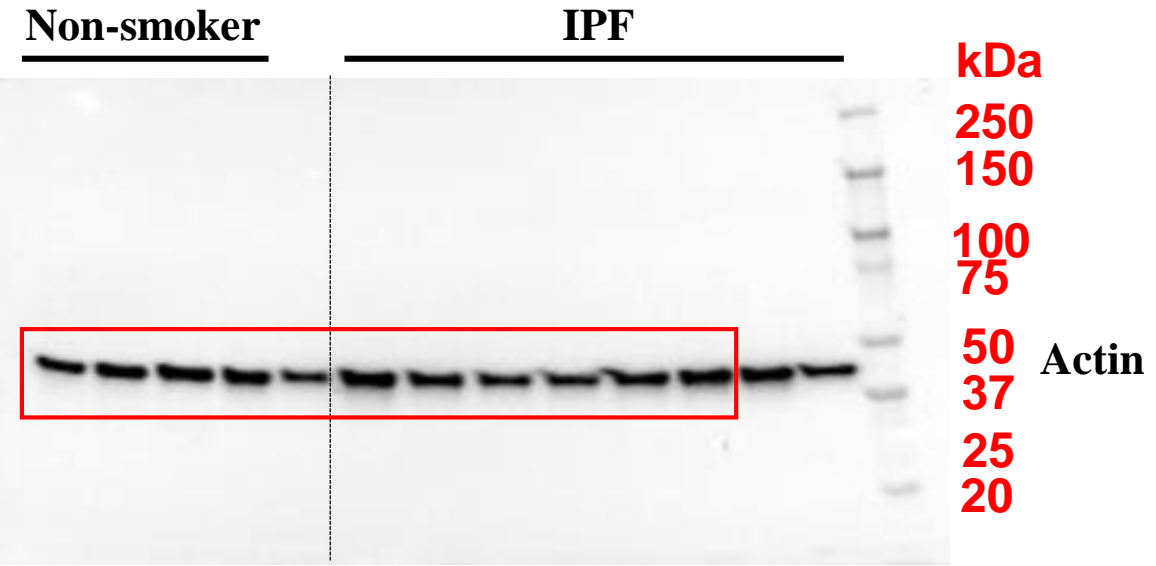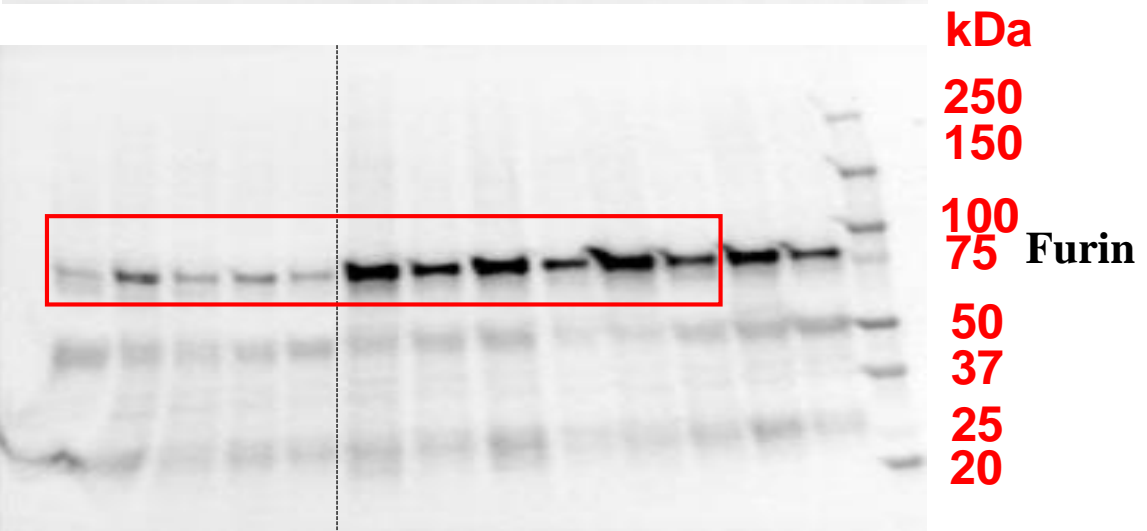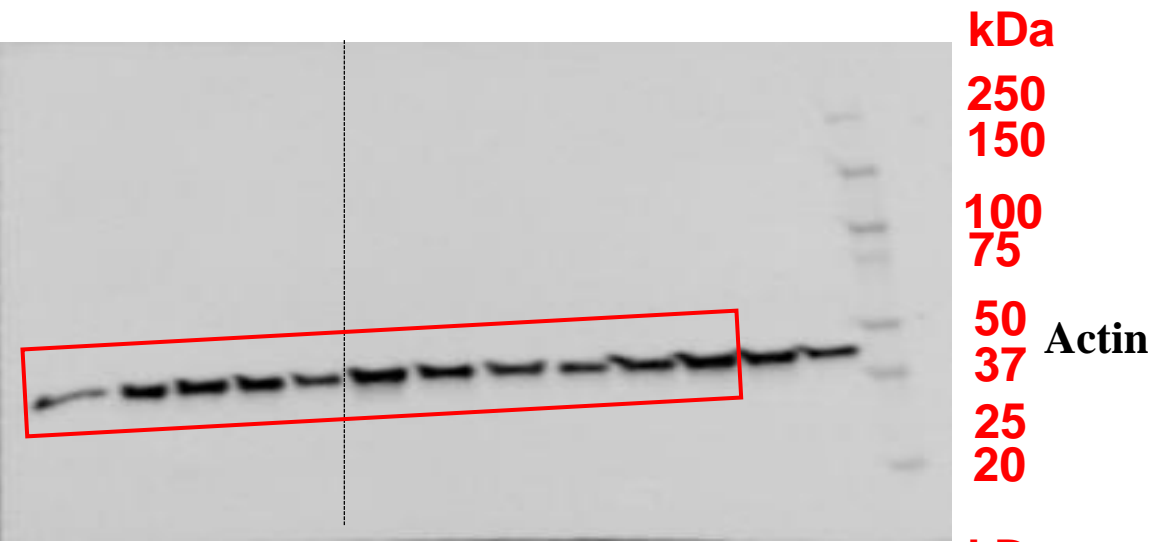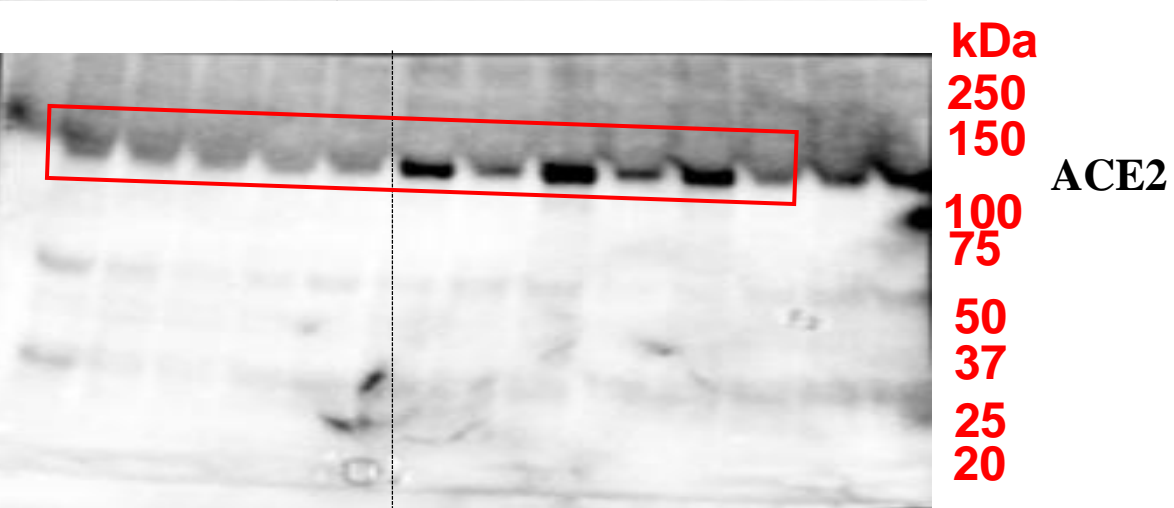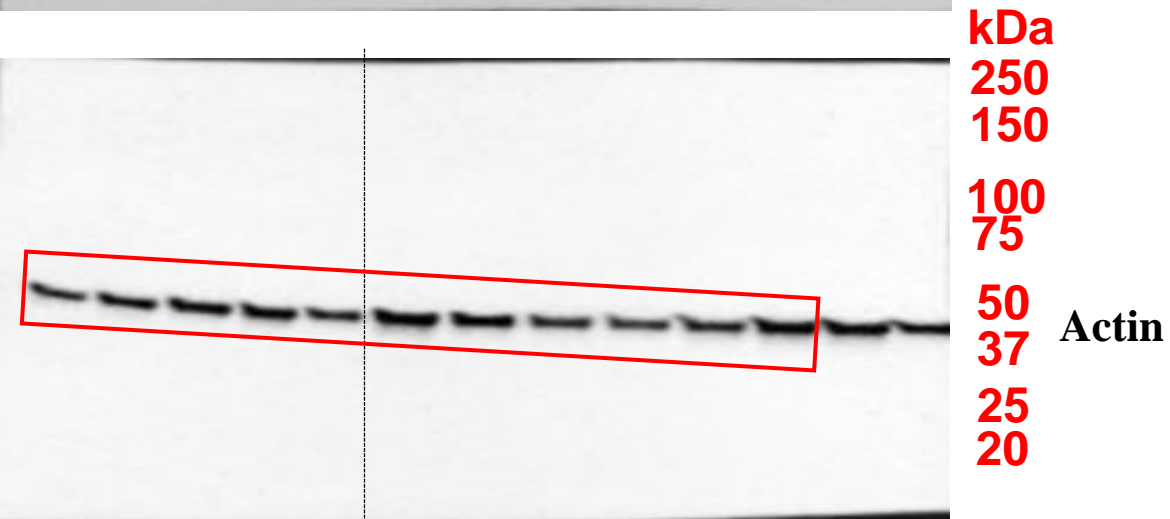

Supplement: DataSheet_1.pdf [file DataSheet_1.pdf]
